# Supplementary material
Source: HighWire-hosted journal article supplement (http://ajnr-stage2.highwire.org/highwire/filestream/52841/field_highwire_adjunct_files/0/15-00667.pdf)
Supplement: 15-00667.pdf [file 15-00667.pdf]

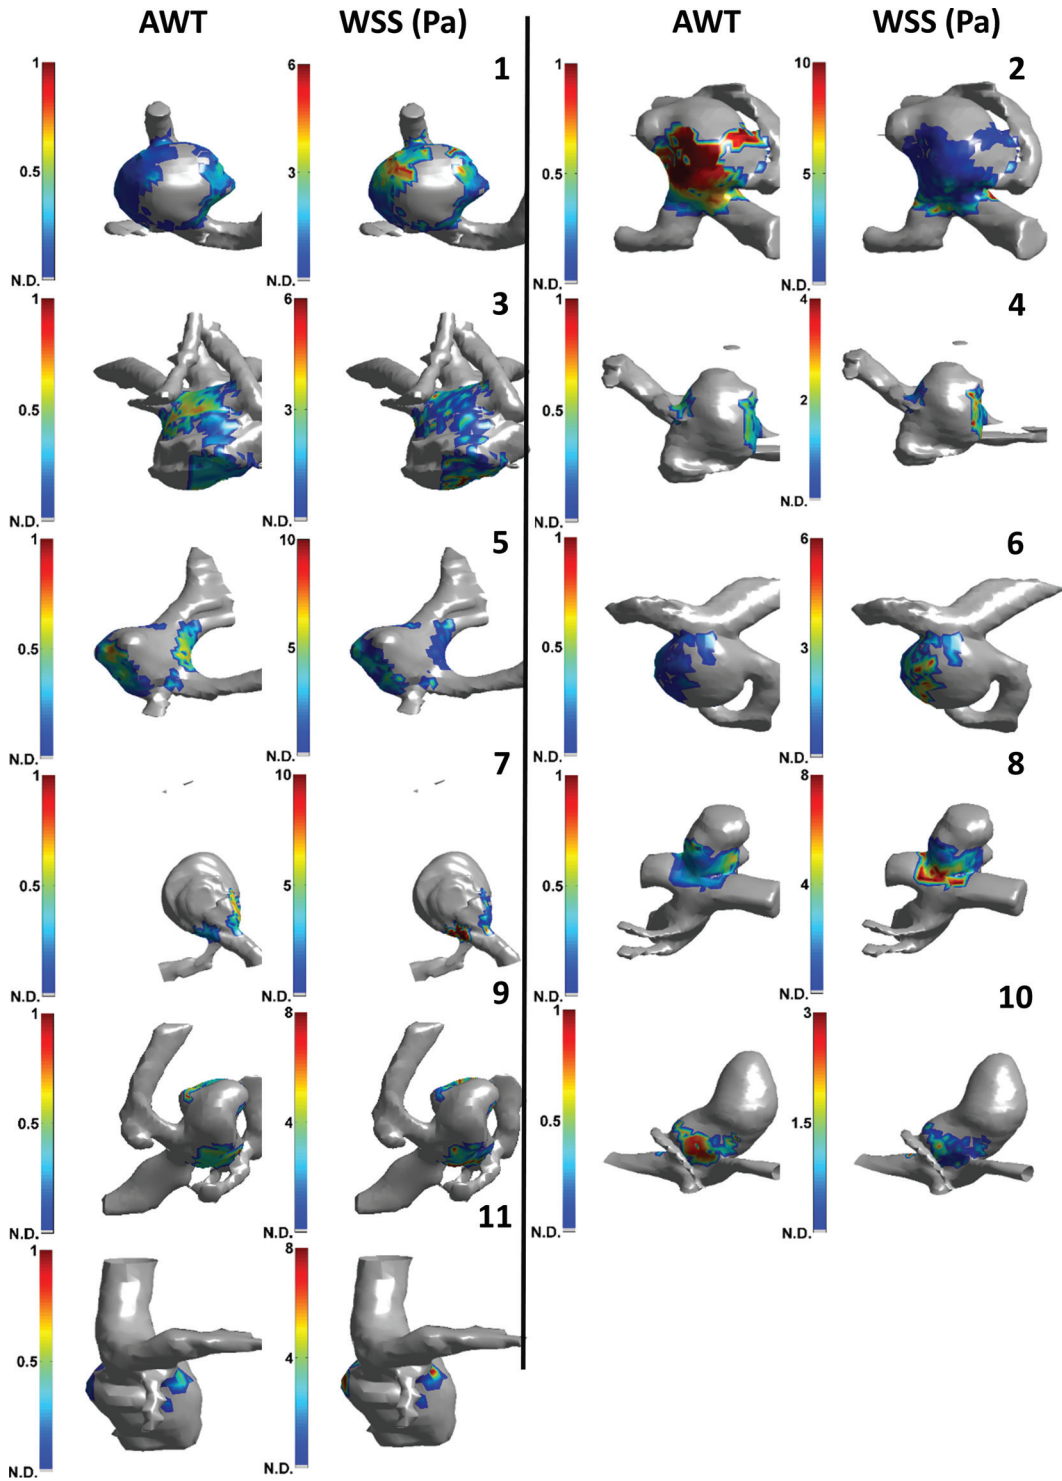

**ON-LINE FIGURE.** Visual comparison between apparent wall thickness and wall shear stress in intracranial aneurysms on 7T MR imaging. The aneurysms are the same as those in Fig 3 but shown from the back side.
